# Supplementary material
Source: ML conference proceedings conference paper supplement (https://aclanthology.org/2022.findings-naacl.93)
Supplement: software [file Readme.pdf › Models/Readme.pdf]

This folder contains the following pre-trained FAtNet models.

1. FAtNet.pt
2. FAtNet2.pt

These models have been trained on the [VoxCeleb-2](#) dev set. We used the Pytorch library to train these models.
